# Supplementary material for: Racial and Ethnic Service Use Disparities Among Homeless Adults With Severe Mental Illnesses Receiving ACT
Source: Atypon-hosted journal article supplement (doi:10.1176/ps.62.6.pss6206_0598), 2011-06-01
Supplement: Horvitz-Lennon _ds.pdf [file Horvitz-Lennon%20_ds.pdf]

**Table**

Baseline characteristics of homeless adults with severe mental illnesses, by racial and ethnic group

| Variable                                 | All<br>(N=6,829) |    | Blacks<br>(N=3,394) |    | Latinos<br>(N=381) |    | Whites<br>(N=3,054) |    | p     |
|------------------------------------------|------------------|----|---------------------|----|--------------------|----|---------------------|----|-------|
|                                          | N                | %  | N                   | %  | N                  | %  | N                   | %  |       |
| Age (M±SD)                               | 37.8±9.5         |    | 37.5±8.7            |    | 37.0±9.5           |    | 38.4±10.2           |    | <.001 |
| Men                                      | 4,252            | 62 | 2,051               | 61 | 272                | 71 | 1,929               | 63 | <.001 |
| Married                                  | 366              | 5  | 160                 | 5  | 30                 | 8  | 176                 | 6  | .01   |
| Psychiatric symptoms (M±SD) <sup>a</sup> | .53±.25          |    | .53±.25             |    | .59±.24            |    | .51±.24             |    | <.001 |
| Psychotic symptoms (M±SD) <sup>b</sup>   | 11.1±9.3         |    | 12.6±9.4            |    | 14.6±10.5          |    | 9.0±8.6             |    | <.001 |
| Psychiatric burden (M±SD) <sup>c</sup>   | 3.1±1.7          |    | 3.2±1.7             |    | 3.2±1.9            |    | 2.9±1.7             |    | <.001 |
| Substance use disorder diagnosis         | 3,623            | 53 | 1,982               | 58 | 202                | 53 | 1,439               | 47 | <.001 |
| Medical burden <sup>d</sup>              |                  |    |                     |    |                    |    |                     |    | ns    |
| 0 conditions                             | 1,209            | 18 | 633                 | 19 | 69                 | 19 | 507                 | 17 |       |
| 1–2 conditions                           | 2,724            | 42 | 1,377               | 42 | 143                | 40 | 1,204               | 41 |       |
| 3–4 conditions                           | 1,684            | 26 | 815                 | 25 | 93                 | 26 | 776                 | 27 |       |
| {≥}5 conditions                          | 946              | 14 | 443                 | 14 | 57                 | 16 | 446                 | 15 |       |
| Chronic homelessness                     | 3,670            | 54 | 1,939               | 57 | 204                | 54 | 1,527               | 50 | <.001 |
| Chronic unemployment                     | 3,361            | 49 | 1,738               | 51 | 208                | 55 | 1,415               | 46 | <.001 |
| Education (M±SD years) <sup>e</sup>      | 11.6±2.5         |    | 11.5±2.3            |    | 9.6±3.4            |    | 11.9±2.6            |    | <.002 |
| State                                    |                  |    |                     |    |                    |    |                     |    | <.001 |
| Connecticut                              | 778              | 11 | 333                 | 10 | 138                | 36 | 307                 | 10 |       |
| Pennsylvania                             | 788              | 12 | 614                 | 18 | 24                 | 6  | 150                 | 5  |       |
| Virginia                                 | 755              | 11 | 501                 | 15 | 15                 | 4  | 239                 | 8  |       |
| North Carolina                           | 759              | 11 | 465                 | 14 | 9                  | 2  | 285                 | 9  |       |
| Texas                                    | 757              | 11 | 257                 | 8  | 57                 | 15 | 443                 | 15 |       |
| Illinois                                 | 742              | 11 | 462                 | 14 | 32                 | 8  | 248                 | 8  |       |
| Missouri                                 | 751              | 11 | 377                 | 11 | 25                 | 7  | 349                 | 11 |       |
| Kansas                                   | 803              | 12 | 211                 | 6  | 25                 | 7  | 567                 | 19 |       |
| Washington                               | 696              | 10 | 174                 | 5  | 56                 | 15 | 466                 | 15 |       |

<sup>a</sup> This measure of overall psychiatric morbidity was a composite psychiatric score from the Addiction Severity Index, where possible scores range from 0 to 1, with higher scores indicating more illness.

<sup>b</sup> This measure was adapted from the Diagnostic Interview Schedule and the Psychiatric Epidemiology Research Interview Schedule. Possible scores range from 0 to 40, with higher scores indicating greater severity of psychosis.

- <sup>c</sup> Number of psychiatric diagnoses. Possible scores range from 0 to 11, with higher values indicating greater mental health need.
- <sup>d</sup> Categorical variable reflecting the number of endorsed medical conditions out of a maximum of 17. Data were missing for 13% of blacks, 16% of Latinos, and 12% of whites.
- <sup>e</sup> Mean years of education was lower for Latinos than for whites and blacks.
